# Supplementary material for: TRIC-A shapes oscillatory Ca2+ signals by interaction with STIM1/Orai1 complexes
Source: PubMed Central journal article supplement (PMC7202670; doi:10.1371/journal.pbio.3000700), 2020-04-24

**Figure 5**

**J**

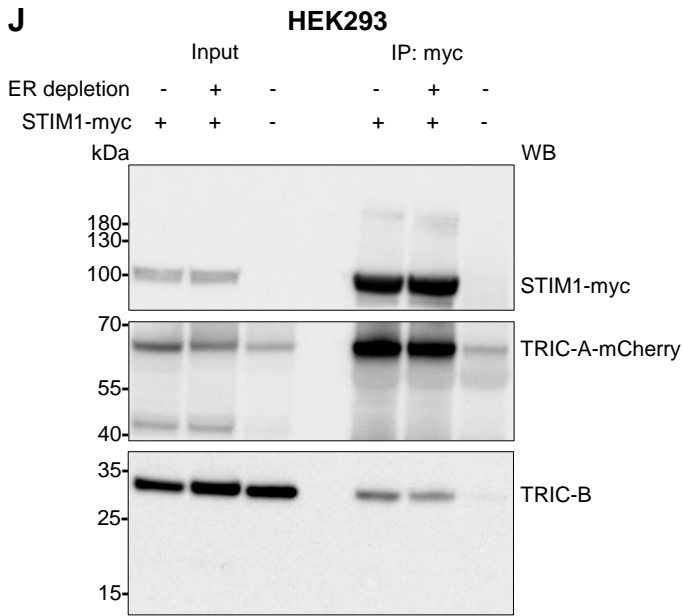

**K**

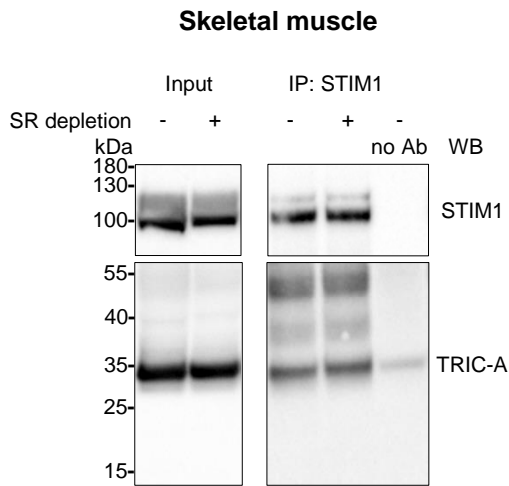

# Figure S1

**A**

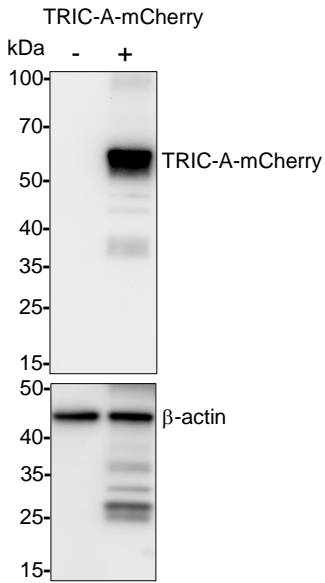

**Figure S6**

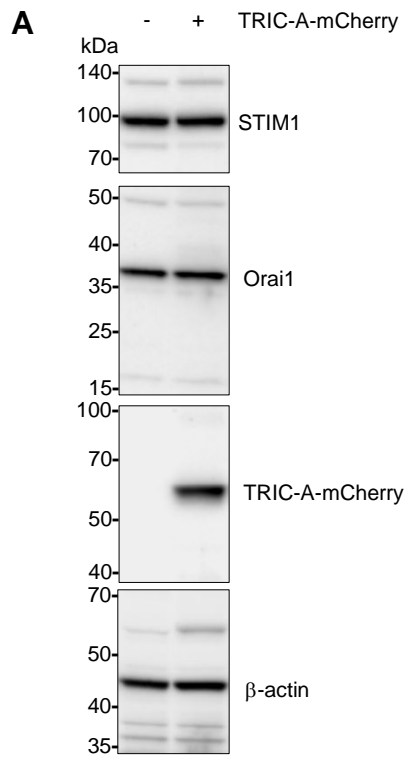

**Figure S7**

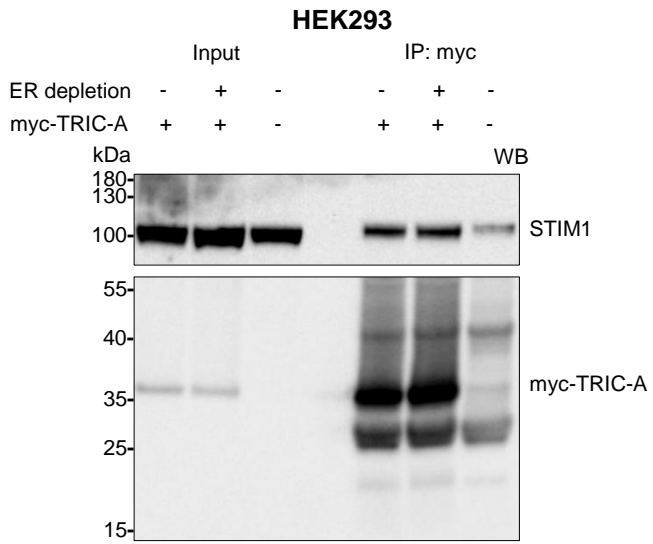

Supplement: pbio.3000700.s013.pdf [file pbio.3000700.s013.pdf]
